# Supplementary material for: Mesostructured TiO 2 with abundant oxygen vacancies for excellent photocatalytic hydrogen production under mild conditions
Source: Royal Society of Chemistry journal article supplement (doi:10.1039/d5cc05245a), 2025-12-05
Supplement: d5cc05245a1.pdf [file d5cc05245a1.pdf]

## Supporting Information

### **Mesostructured TiO<sub>2</sub> with Abundant Oxygen Vacancies for Excellent Photocatalytic Hydrogen Production under Mild Conditions**

Chen-Yu Wang,<sup>a</sup> Yi Lu,<sup>\*b</sup> Jie Hu,<sup>\*c</sup> Xiao-Fang Zhao,<sup>b</sup> Zhe Lu,<sup>b</sup> Di Li,<sup>b</sup> Li-Ying Wang,<sup>d</sup> Sheng-Fei Hu,<sup>a</sup> Ge Tian<sup>b</sup> and Xiao-Yu Yang<sup>\*b</sup>

<sup>a</sup> Department of Chemistry, Georgia State University, Atlanta, GA, 30303, USA  
<sup>1</sup> School of Materials and Chemical Engineering, Hubei University of Technology, Wuhan, 430068, China

<sup>b</sup> State Key Laboratory of Advanced Technology for Materials Synthesis and Processing, Wuhan University of Technology, Wuhan, 430070, China.

<sup>c</sup> School of Materials and Science, Chongqing Jiaotong University, Chongqing, 400074, China

<sup>d</sup> Wuhan Institute of Physics and Mathematics, Chinese Academy of Sciences, Wuhan 430071, China

\* Corresponding Author

E-mail: yilu@whut.edu.cn; hujie@cqjtu.edu.cn; xy yang@whut.edu.cn

#### **Author Contributions**

C. Y. W., J. H. X. F. Z. and D. L. did the experiments of synthesis and photocatalytic performance. Z. L. did the TEM and photoelectrochemical characterizations. Y. L. conceived the project, provided the idea, and designed the experiments. L. Y. W. helped with the NMR measurements and corresponding analysis. G. T. helped with the TEM, STEM measurements and corresponding analysis. X. Y. Y. conceived the project, supported the scientific and technological platform. S. F. H. revised the paper. C. Y. W., J. H., and Y. L. wrote and revised the paper. All the authors discussed the results and analyzed the data.

## **Experimental section**

### **Materials**

Titanium butoxide (TBT) ( $\geq 98\%$ , Shanghai Test), acetate ( $\geq 99.5\%$ , Shanghai Test), 1-butyl-3-methylimidazolium tetrafluoroborate ([OMIm][BF<sub>4</sub>]) ( $\geq 99\%$ , Lanzhou Greenchem ILs) and commercial anatase TiO<sub>2</sub> nanoparticles (designed as Nano-TiO<sub>2</sub>, Aldrich). All chemicals were used as obtained from commercial sources without further purification and distilled water was used in the whole experiment.

### **Synthesis and purification of OM-TiO<sub>2</sub>-600**

In a typical synthesis, 1 mL distilled water (DW) was mixed with 25 mL acetic acid in a 50 mL sealed Teflon-lined stainless steel autoclave. After stirring for five minutes, 1 mL [OMIm][BF<sub>4</sub>] was added to the mixed solution. Next, 2 mL TBOT was added to the mixed solution and left to stir for 10 minutes. The autoclave was sealed and heated to 180 °C for 24 h. After cooling to room temperature, the sample was obtained through centrifugal separation, washed three times with water and ethanol, respectively, and then dried at 60 °C for 12 h to obtain the OM-TiO<sub>2</sub>. The OM-TiO<sub>2</sub> sample was finally calcined at 600 °C in air for 4 h. The products were donated as mesoporous TiO<sub>2</sub> (TiO<sub>2</sub>-OM-600). Commercial anatase TiO<sub>2</sub> was chosen for comparison.

### **Characterization**

The sample's morphology was investigated by scanning electron microscopy (FE-SEM, S-4800, HITACHI) at 5 kV. To identify the TiO<sub>2</sub> phases, powder X-ray diffraction (XRD) patterns were obtained by a D8 Advance X-ray diffractometer (Bruker, Germany) with Cu-K $\alpha$  radiation ( $\lambda = 0.15406$  nm) operated at 40 kV, 40 mA. Transmission electron microscopy (TEM) experiments were conducted on a JEM-2100F STEM/EDS electron microscope

operated at 200 kV. Thermogravimetric analysis (TGA) was performed using a STA449F3 thermal analysis instrument at a temperature ramping rate of 10 °C/min in air. The nitrogen adsorption and desorption isotherms of TiO<sub>2</sub> samples were measured using a Micromeritics ASAP 3020 system. The specific surface area was measured at -196 °C on a Micromeritics ASAP 3020 system according to the Brunauer-Emmett-Teller (BET) method. The pore size distribution was calculated from the adsorption isotherm branch using the Barrett-Joyner-Halenda (BJH) method. Fourier-transform infrared (FT-IR) spectra were obtained with a Nicolet 6700 spectrometer. Electron paramagnetic resonance (EPR) measurements were performed at the X-band using a JEOL FA 2000 spectrometer. <sup>1</sup>H MAS and 2D 1H TQ-SQ and DQ-SQ MAS NMR spectra were carried out in a 1.9 mm MAS probe on a Bruker AVANCE-III 500 spectrometer with a sample spinning rate of 40 kHz, a <sup>1</sup>H  $\pi/2$  pulse length of 1.65 us and a recycle delay of 4 s. <sup>19</sup>F MAS NMR spectra was carried out in a 2.5 mm MAS probe on a Bruker AVANCE-III 500 spectrometer with a sample spinning rate of 30 kHz, a <sup>19</sup>F  $\pi/2$  pulse length of 1.9 us and a recycle delay of 1 s. X-ray photoelectron spectroscopy (XPS) measurements of samples were performed on a PHI Quantera II, (ULVAC-PHI, Japan) for chemical composition analysis, all binding energies were calibrated to the C1s peak at 284.8 eV. UV-visible diffuse-reflectance spectrum (UV-Vis DRS) were measured on a UV-visible spectrophotometer (UV-2550, Shimadzu, Japan). The photoluminescence spectra (PL) were recorded on LS 55 (PERKINELMER) with an excitation wavelength of 320 nm. Electrochemical impedance spectroscopy (EIS) analysis was conducted by an Autolab PGSTAT302N working station (Metrohm, Switzerland) using a three-electrode configuration with the above photoanode as a working electrode, Ag/AgCl electrode as a reference electrode and platinum foil as the counter electrode. The transient photocurrent response vs time was measured under chopped UV-vis light irradiation.

### **Photocatalytic measurements**

The photocatalytic H<sub>2</sub> production was measured using a closed circulation system (Prefect light Labsolar 6A) with a 300 W Xe lamp (PLS-SXE-300C lamp) placed 10 cm away from the suspension. The amount of 20 mg of sample was dispersed in a water/methanol mixture (3:1, v/v, 80 mL) and 5.2 μL of H<sub>2</sub>PtCl<sub>6</sub> (0.1 mmol/L) was added after transfer into a quartz container with an inner diameter of 7 cm. The produced H<sub>2</sub> was analyzed by an Agilent 7890 A gas chromatograph (GC) with a thermal conductivity detector (TCD). Photocatalytic reaction under the -10 °C was carried out in a closed container connected with a cooling liquid circulator pump and 20 wt.% of NaCl aqueous solution was used to prevent freezing. Water was used as a circulator liquid to maintain temperature at about 80 °C and 25°C, while ethanol was used as a cooling liquid to keep the temperatures at about -10 °C. The seawater was obtained from the South China Sea and filtered to remove the particles and algae before use.

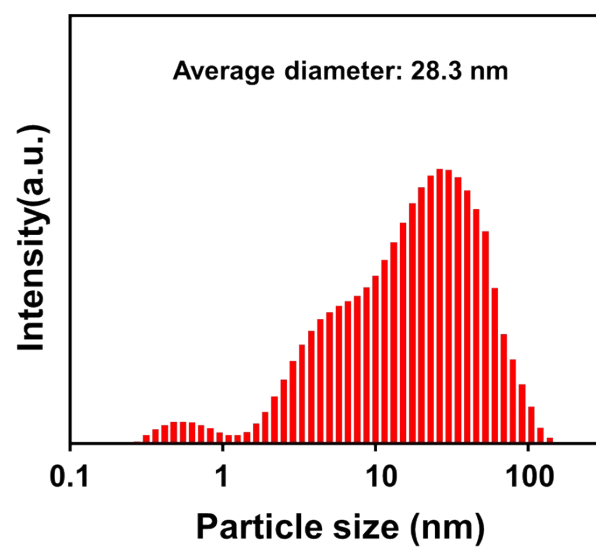

**Fig. S1.** Size distribution curves of TiO<sub>2</sub>-IL oligomers in acetic acid solution.

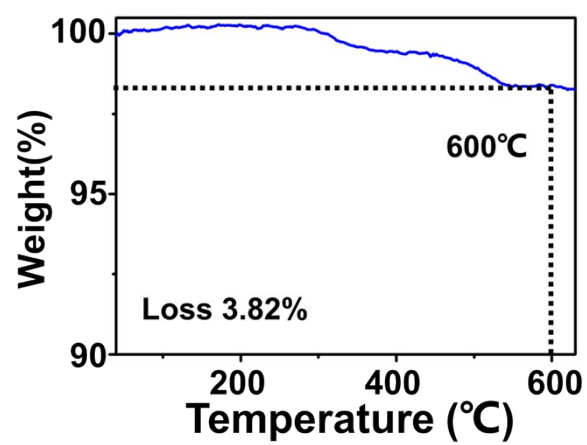

**Fig. S2.** TGA image of TiO<sub>2</sub>-OM.

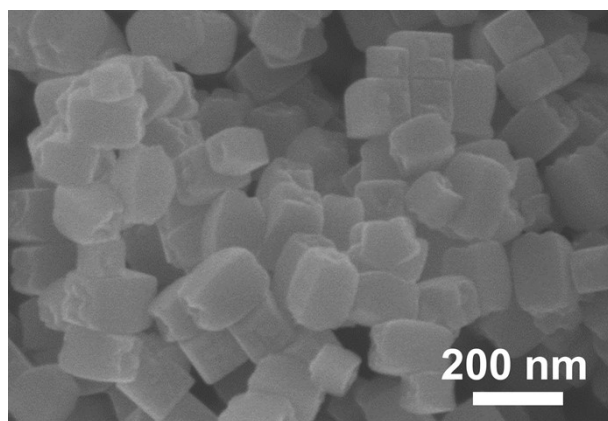

**Fig. S3.** SEM image of OM-TiO<sub>2</sub>

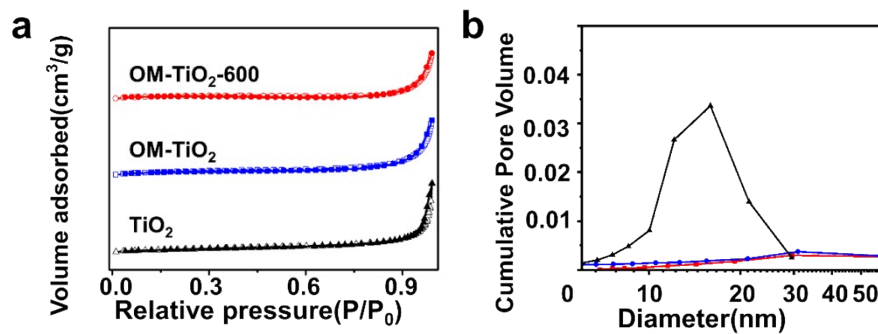

**Fig. S4** N<sub>2</sub> adsorption-desorption isotherm (a) and pore size distribution (b) of the TiO<sub>2</sub>、 OM-TiO<sub>2</sub> and OM-TiO<sub>2</sub>-600.

**Table S1** The BET specific surface area of different TiO<sub>2</sub> photocatalysts

| Samples                  | BET surface area,<br>m <sup>2</sup> /g | Pore volume, cm <sup>3</sup> /g | Pore size, nm |
|--------------------------|----------------------------------------|---------------------------------|---------------|
| TiO <sub>2</sub>         | 24.5                                   | 0.054                           | 14.8          |
| OM-TiO <sub>2</sub>      | 13.2                                   | 0.044                           | /             |
| OM-TiO <sub>2</sub> -600 | 9.3                                    | 0.029                           | /             |



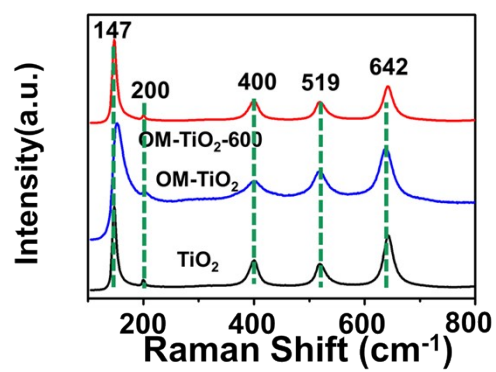

**Fig. S5.** Raman spectra of OM-TiO<sub>2</sub>-600 、 OM-TiO<sub>2</sub> and commercial TiO<sub>2</sub>

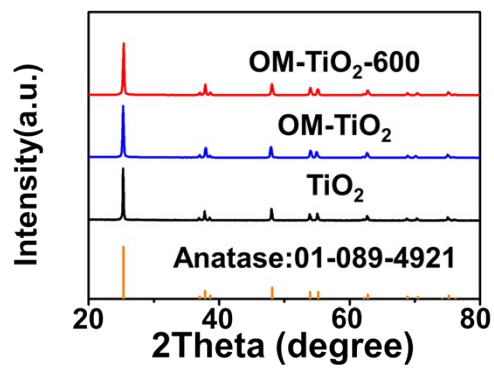

**Fig. S6.** XRD patterns of commercial TiO<sub>2</sub>、OM-TiO<sub>2</sub> and OM-TiO<sub>2</sub>-600.

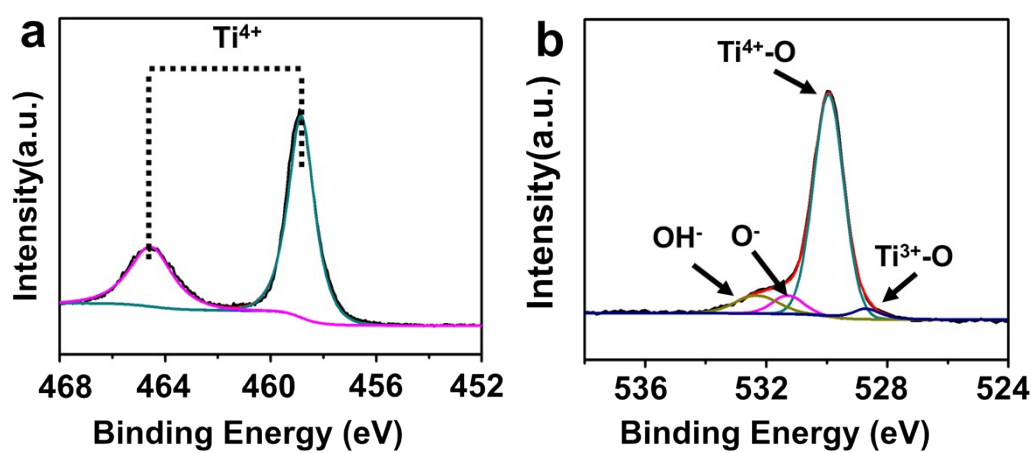

Fig. S7. (a) Ti 2p XPS of OM-TiO<sub>2</sub>, (b) O 1s XPS spectrum of OM-TiO<sub>2</sub>-600

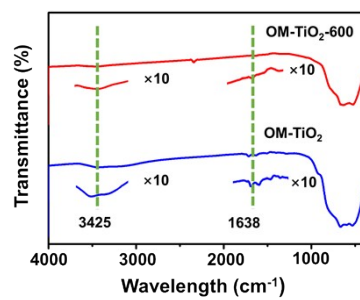

**Fig. S8.** FT-IR spectra of OM-TiO<sub>2</sub>-600、OM-TiO<sub>2</sub>.

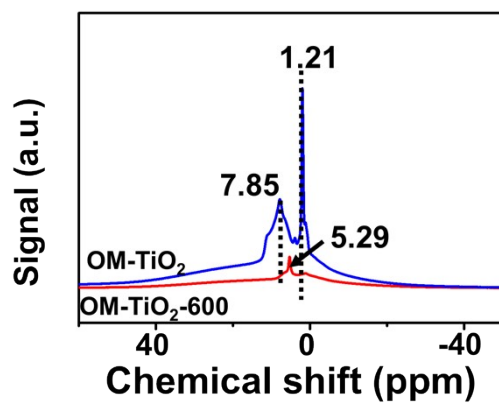

**Fig. S9.**  $^1\text{H}$  NMR spectra of OM-TiO<sub>2</sub> and OM-TiO<sub>2</sub>-600.

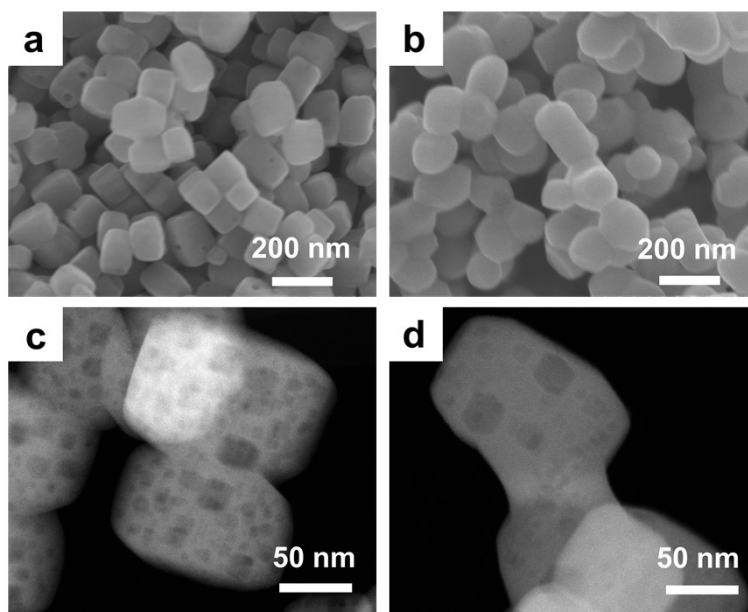

**Fig. S10.** SEM images of (a) OM-TiO<sub>2</sub>-600-700, (b) OM-TiO<sub>2</sub>-600-800, HAADF-STEM images of (c) OM-TiO<sub>2</sub>-600-H and (d) OM-TiO<sub>2</sub>-600-S.

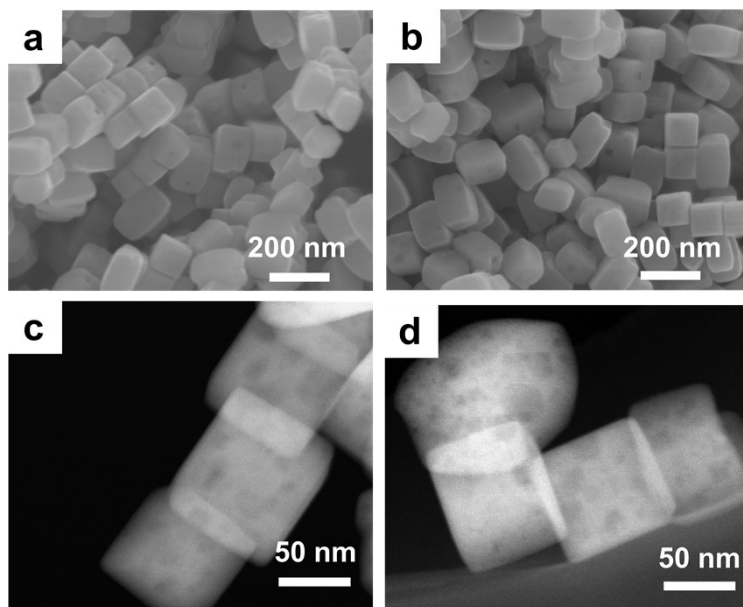

**Fig. S11.** SEM images of (a) OM-TiO<sub>2</sub>-600-H and (b) OM-TiO<sub>2</sub>-600-S, HAADF-STEM images of (c) OM-TiO<sub>2</sub>-600-700, (d) OM-TiO<sub>2</sub>-600-800,

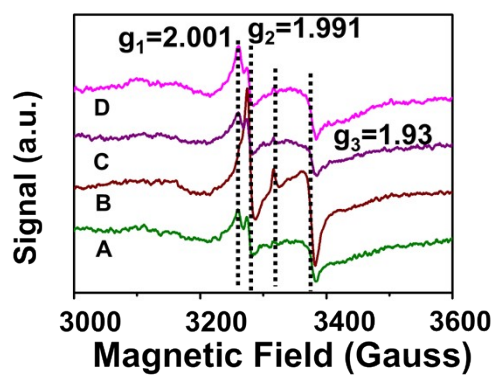

**Fig. S12.** EPR spectra of (A) OM-TiO<sub>2</sub>-600-700, (B) OM-TiO<sub>2</sub>-600-800, (C) OM-TiO<sub>2</sub>-600-H and (D) OM-TiO<sub>2</sub>-600-S.



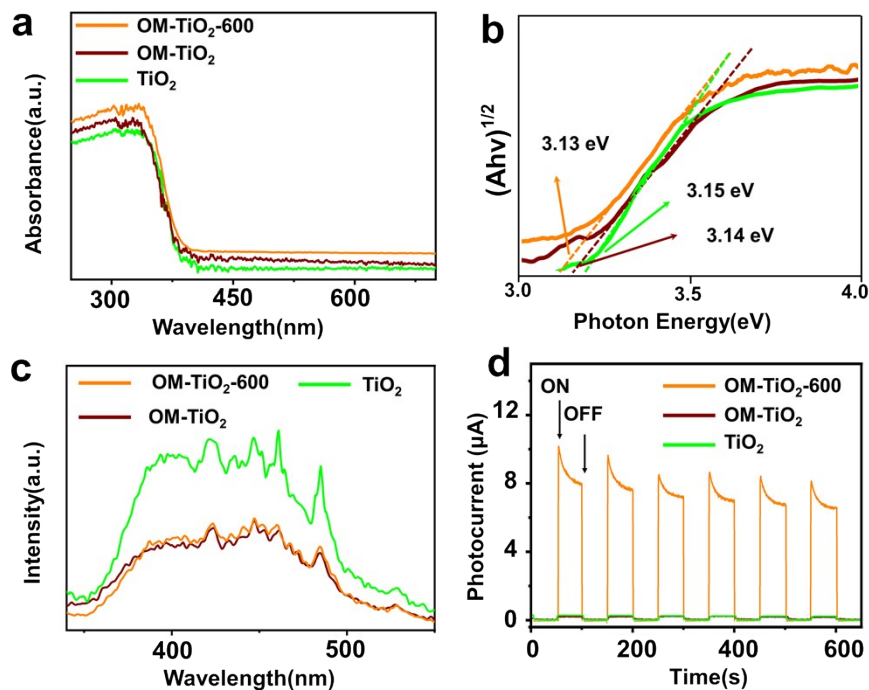

**Fig. S13.** (a) UV-vis diffuse reflection spectra, (b) the corresponding Tauc plot vs  $h\nu$  curve; (c) photoluminescence (PL) spectra and (d) Transient photocurrent responses of commercial  $\text{TiO}_2$ , OM- $\text{TiO}_2$  and OM- $\text{TiO}_2$ -600.

**Table S2.** Overview of the TiO<sub>2</sub>-based photocatalysts in different solutions

| Photocatalyst                       | Water Source        | Activity<br>(mmol h <sup>-1</sup> g <sup>-1</sup> ) | Light source     | Reference                             |
|-------------------------------------|---------------------|-----------------------------------------------------|------------------|---------------------------------------|
| TiO <sub>2</sub>                    | water               | 69.0                                                | 300 W xenon lamp | This work                             |
|                                     | Artificial seawater | 81.0                                                |                  |                                       |
|                                     | Seawater            | 72.0                                                |                  |                                       |
| TiO <sub>2</sub>                    | Artificial seawater | 18.1                                                | 300 W Xenon lamp | ACS Nano 2023, 17, 18217              |
| TiO <sub>2</sub> /Cu <sub>2</sub> O | Seawater            | 17.9                                                |                  |                                       |
| TiO <sub>2</sub>                    | water               | 57.9                                                | 300 W Xenon lamp | Chem. Eng. J. 2020, 400, 125909.      |
|                                     | Artificial seawater | 46.6                                                |                  |                                       |
| Pt/TiO <sub>2</sub> (P25)           | water               | 58.0                                                | LED UV light     | Fuel, 2023, 354, 129248               |
| SnO <sub>2</sub> /TiO <sub>2</sub>  | water               | 16.7                                                | 300 W Xenon lamp | Chin. Chem. Lett. 2023, 34,107125     |
| TiO <sub>2</sub>                    | water               | 12.5                                                | 300 W xenon lamp | J. Am. Chem. Soc., 2024, 146, 1701    |
| NiS <sub>2</sub> /TiO <sub>2</sub>  | water               | 10.4                                                | 300 W Xenon lamp | Int. J. Hydrog. Energy, 2024, 91, 673 |
|                                     | Artificial seawater | 12.5                                                |                  |                                       |
|                                     | seawater            | 12.0                                                |                  |                                       |
| CoS <sub>2</sub> /TiO <sub>2</sub>  | water               | 2.2                                                 |                  |                                       |
|                                     | Artificial seawater | 9.9                                                 |                  |                                       |
|                                     | seawater            | 6.2                                                 |                  |                                       |
| SnS <sub>2</sub> /TiO <sub>2</sub>  | water               | 1.6                                                 |                  |                                       |
|                                     | Artificial seawater | 2.5                                                 |                  |                                       |
|                                     | Seawater            | 3.8                                                 |                  |                                       |
| Cu <sub>2</sub> O/TiO <sub>2</sub>  | Water               | 11.0                                                | 300 W Xenon lamp | J. Alloy. Compd., 2021, 868, 159144   |
|                                     | Seawater            | 5.1                                                 |                  |                                       |
| TiO <sub>2</sub> -rGO-Cu            | Artificial seawater | 16.1                                                | 300 W Xenon lamp | Chem. Phys. Lett, 2023, 822, 140498   |

**Table S3** Overview of the TiO<sub>2</sub> and other photocatalysts under extreme temperature

| Photocatalyst                         | Water Source           | Activity<br>(mmol h <sup>-1</sup> g <sup>-1</sup> ) | Temperature<br>(°C) | Reference                                  |
|---------------------------------------|------------------------|-----------------------------------------------------|---------------------|--------------------------------------------|
| TiO <sub>2</sub>                      | NaCl/methanol solution | 63.0                                                | -10                 | This work                                  |
|                                       | NaCl/methanol solution | 85.0                                                | 80                  |                                            |
| TiO <sub>2</sub>                      | NaCl/methanol solution | 20                                                  | -20                 | ACS Appl. Mater.<br>Inter. 2024, 16, 47695 |
|                                       |                        | 32                                                  | -10                 |                                            |
|                                       |                        | 39                                                  | 80                  |                                            |
| CNT/CdS                               | Water/triethanolamine  | 0.45                                                | 80 °C               | Adv. Mater. 2020, 32,<br>1906361           |
| Ti/TiO <sub>2</sub>                   | Water/methanol         | 0.5                                                 | 60                  | ACS Catal. 2015, 5,<br>4790                |
| CoO                                   | water                  | 5.8                                                 | 73                  | Nat. Commun. 2021,<br>12, 1343             |
| SnSe/ZnIn <sub>2</sub> S <sub>4</sub> | Water/triethanolamine  | 5.7                                                 | 73                  | Chem. Eng. J. 2021,<br>404, 126477         |
| Rh/SrTiO <sub>3</sub> :Ir             | Water                  | 5.0                                                 | 67                  | J. Phys. Chem. C<br>2025, 129, 2381        |

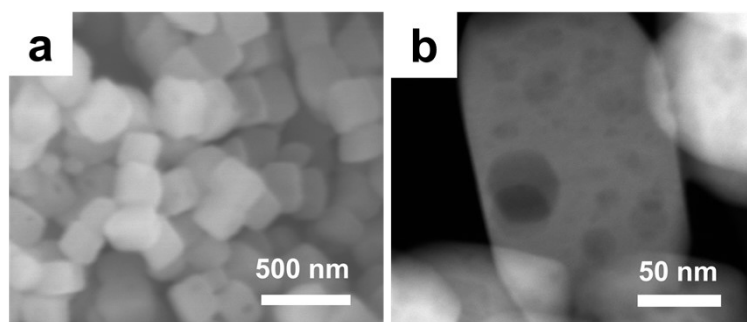

**Fig. S14** (a) SEM image and (b) HAADF-STEM image of OM-TiO<sub>2</sub>-600 after 100 h reaction
